# Supplementary material for: Exposure of α-Synuclein Aggregates to Organotypic Slice Cultures Recapitulates Key Molecular Features of Parkinson's Disease
Source: PubMed Central journal article supplement (PMC8925863; doi:10.3389/fneur.2022.826102), 2022-02-16
Supplement: presentation_1.pdf [file presentation_1.pdf]

## Exposure of $\alpha$ -synuclein aggregates to organotypic slice cultures recapitulates the molecular features of Parkinson's disease

Serge Moudio<sup>1\*</sup>, Fredrik Rodin<sup>1</sup>, Nazira Jamal Albargothy<sup>1</sup>, Urban Karlsson<sup>2</sup>, Juan F. Reyes<sup>1</sup>, Martin Hallbeck<sup>1\*</sup>

<sup>1</sup>Department of Clinical Pathology and Department of Biomedical and Clinical Sciences, Linköping University, Linköping, Sweden

<sup>2</sup> Department of Biomedical and Clinical Sciences, Linköping University, Linköping, Sweden

**\* Correspondence:**

Martin Hallbeck

[martin.hallbeck@liu.se](mailto:martin.hallbeck@liu.se)

Serge Moudio

[serge.moudio@uclouvain.be](mailto:serge.moudio@uclouvain.be)

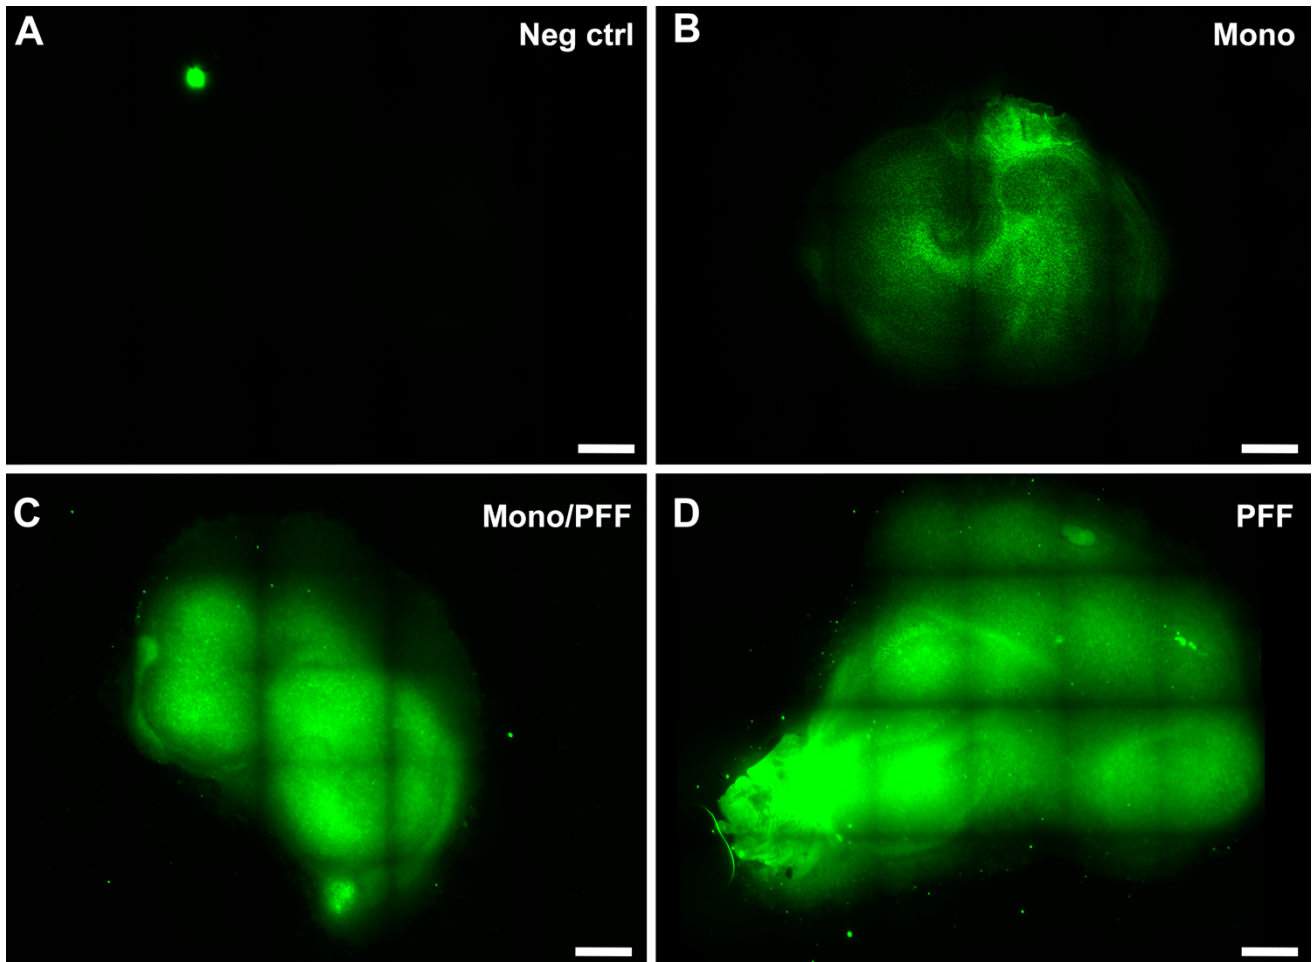

**Supplemental Figure 1.  $\alpha$ -synuclein accumulation within organotypic hippocampal slices cultured for 57 DIV.** Representative (10x) immunofluorescent images after staining for  $\alpha$ -synuclein in control slice (A) or treated with monomers (B) monomers/PFF (C) or PFF (D) respectively. Scale bar = 500  $\mu$ m.

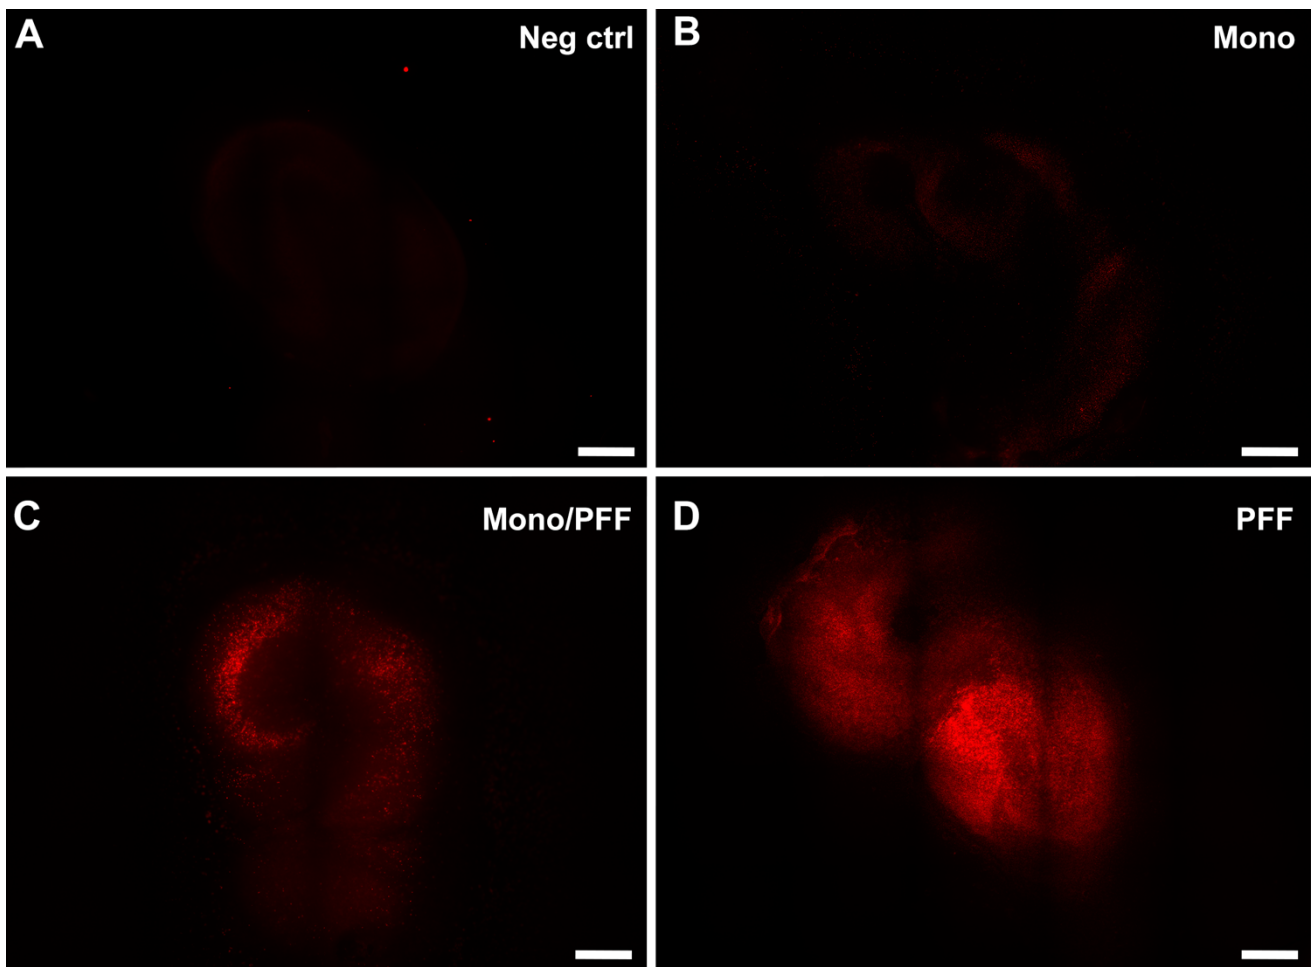

**Supplemental Figure 2. accumulation of phosphorylated  $\alpha$ -synuclein within organotypic hippocampal slices cultured for 57 DIV.** Representative (10x) immunofluorescent images after staining for pS129  $\alpha$ -synuclein in control slice (A) or treated with monomers (B) monomers/PFF (C) or PFF (D) respectively. Scale bar = 500  $\mu$ m.

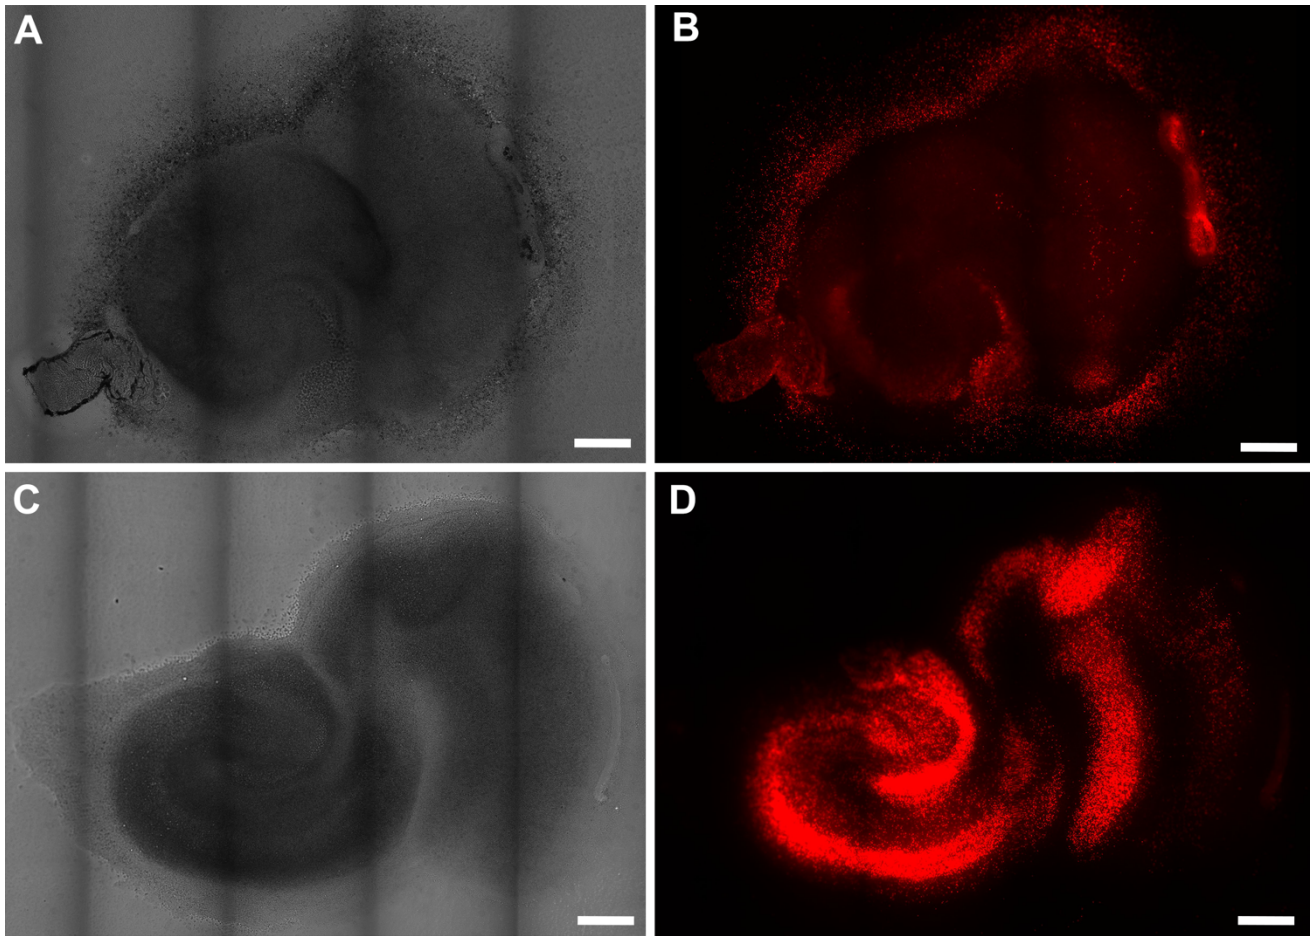

**Supplemental Figure 3. Mono/PFF induces cell death in organotypic slices cultured for 57 DIV.** Representative (10x) bright field (A and C) and fluorescent propidium iodide (B and D) images of organotypic hippocampal slices for negative control (A and B) and Mono/PFF (C and D) after 57 DIV. Scale bar = 500  $\mu$ m.
